# Supplementary material for: Organ dysfunction and death in patients admitted to hospital with COVID-19 in pandemic waves 1 to 3 in British Columbia, Ontario and Quebec, Canada: a cohort study
Source: PubMed Central journal article supplement — CMAJ Open. 2022 Apr 19;10(2):E379–89. doi: 10.9778/cmajo.20210216 (PMC9022939; doi:10.9778/cmajo.20210216), 2022-04-19
Supplement: 2021-0216-1-at.pdf [file 2021-0216-1-at.pdf]

## Appendix 1: Supplemental material

### Exclusions

We enrolled 2088 patients in ARBs CORONA I. The following patients were excluded from the current analysis.

- Acute COVID-19 readmissions (n=37)
- Emergency Room admissions without hospitalization (n=125)
- Patients admitted to hospital but not due to acute COVID-19 (n=220)
- Patients with unknown discharge outcome or currently still hospitalized (n=19)
- Patients from sites which only enrolled ICU patients (Alberta; n=350)

Alberta site was different from the other participating sites in that it only enrolled patients who were admitted to ICU. Because the percentage of data from Alberta in ARBs CORONA I varied across waves (13%, 28% and 17% in waves 1, 2 and 3 respectively), the inclusion of Alberta site would thus confound and skew the crude results (for example, with the inclusion of Alberta data, ICU admission rate became 47%, 55% and 44% in waves 1, 2 and 3 respectively).

## Relevant variables captured on ARBs CORONA I CRF

Data were collected by ARBs CORONA Research Coordinators at each site on specifically designed electronic Case Report Forms (CRF) and entered into a REDCap database. The variables selected for inclusion in the CRF were pathogen positivity, baseline characteristics (age, sex, co-morbidities (chronic cardiac, and pulmonary kidney disease, hypertension, diabetes, liver disease, chronic neurologic disease, malignancy, chronic hematologic disease, AIDS/HIV, rheumatologic disease, dementia and malnutrition), COVID-19-vaccine use, vital signs (first available data within 24 hours of admission: temperature, heart rate, respiratory rate, systolic and diastolic blood pressure, oxygen saturation by pulse oximetry), leukocyte (WBC) count, hemoglobin, creatinine, antiviral agents, antibiotics, corticosteroids and type of corticosteroid, and antifungal agents. Outcomes were 28-day mortality, in-hospital mortality, admission to ICU, ventilation, vasopressors and RRT while hospitalized, and hospital length of stay, date of onset and completion of ventilation, vasopressors (Norepinephrine, Levosimendan, Dopamine, Epinephrine, Dobutamine, Vasopressin, Milrinone, Other) and RRT.

COVID-19 therapies were recorded based on literature that showed efficacy and/or their use in sites.

### Antiviral agent

- Ribavirin
- Lopinavir/Ritonavir
- Interferon alpha
- Interferon beta
- Neuraminidase inhibitor
- Other, specify

### Antibiotic (Y/N)

### Corticosteroid (Y/N)

- Type and dose

### Antifungal agent (Y/N)

## **Details on days alive and free (DAF) of invasive mechanical ventilation, vasopressors and RRT**

The days alive and free of ventilation, vasopressors and RRT calculation presents use of these therapies while adjusting for deaths in the first 14 days because many patients die within the first 14 days (1-5). So, if we only reported duration of ventilation in a ventilated patient who died on day 2, the short duration of ventilation is biased by the early death. For patients who survived the first 14 days, DAF was simply the total number of the days free from these therapies. Since mortality was a competing risk for the use of vasopressors, ventilation and RRT, patients who died within 14 days were assigned a zero DAF to increase the penalty for non-survival (6). We calculated DAF over 14 days as in other trials in the critically ill (7).

1. Huang C, Wang Y, Li X, Ren L, Zhao J, Hu Y, et al. Clinical features of patients infected with 2019 novel coronavirus in Wuhan, China. *Lancet*. 2020.
2. Murthy S, Archambault PM, Atique A, Carrier FM, Cheng MP, Codan C, et al. Characteristics and outcomes of patients with COVID-19 admitted to hospital and intensive care in the first phase of the pandemic in Canada: a national cohort study. *CMAJ Open*. 2021;9(1):E181-E8.
3. Piroth L, Cottenet J, Mariet AS, Bonniaud P, Blot M, Tubert-Bitter P, et al. Comparison of the characteristics, morbidity, and mortality of COVID-19 and seasonal influenza: a nationwide, population-based retrospective cohort study. *Lancet Respir Med*. 2021;9(3):251-9.
4. Wang D, Hu B, Hu C, Zhu F, Liu X, Zhang J, et al. Clinical Characteristics of 138 Hospitalized Patients With 2019 Novel Coronavirus-Infected Pneumonia in Wuhan, China. *JAMA*. 2020.
5. Zhou F, Yu T, Du R, Fan G, Liu Y, Liu Z, et al. Clinical course and risk factors for mortality of adult inpatients with COVID-19 in Wuhan, China: a retrospective cohort study. *Lancet*. 2020;395(10229):1054-62.
6. Russell JA, Lee T, Singer J, De Backer D, Annane D. Days alive and free as an alternative to a mortality outcome in pivotal vasopressor and septic shock trials. *J Crit Care*. 2018;47:333-7.
7. National Heart L, Blood Institute ACTN, Truwit JD, Bernard GR, Steingrub J, Matthay MA, et al. Rosuvastatin for sepsis-associated acute respiratory distress syndrome. *N Engl J Med*. 2014;370(23):2191-200.

## Statistical details on 0-1 inflated beta regression

The observed DAF data exhibited a U-shape distribution, with most data concentrated at 0 and 14. We thus used 0-1 inflated beta regression (1) to model the data. Prior work (2,3) on DAF data have also used such an approach.

DAF was expressed as proportion of days (i.e., divided by 14) in the regression model and then back transformed for interpretation. The R package *gamlss* was used to fit a 0-1 inflated beta regression model to the data. The default logit and log link functions were used for the components of the model. Given that the regression model has adjusted for covariates, we computed the marginal mean DAF of each wave by averaging the model predictions obtained from the *predict* function (i.e., fixed wave at a specific value and integrating over the remaining covariates). Estimated mean difference between waves was obtained by taking the difference between the marginal means. 95% confidence intervals were obtained using 1000 bootstrap samples. P values for the comparisons between waves were obtained by resampling under the null hypothesis that there was no difference between waves (1000 samples).

1. Ospina R, Ferrari SLP. Inflated beta distributions. *Statistical Papers*. 2008;51(1):111.
2. Tomazini BM, Maia IS, Cavalcanti AB, Berwanger O, Rosa RG, Veiga VC, et al. Effect of Dexamethasone on Days Alive and Ventilator-Free in Patients With Moderate or Severe Acute Respiratory Distress Syndrome and COVID-19: The CoDEX Randomized Clinical Trial. *JAMA*. 2020;324(13):1307-16.
3. Writing Committee and Steering Committee for the RCG. Effect of a Lower vs Higher Positive End-Expiratory Pressure Strategy on Ventilator-Free Days in ICU Patients Without ARDS: A Randomized Clinical Trial. *JAMA*. 2020;324(24):2509-20.

## ARBs CORONA I study investigators

Appendix 1, as supplied by the authors. Appendix to: Lee T, Cheng MP, Vinh DC, et al. Organ dysfunction and death in patients admitted to hospital with COVID-19 in pandemic waves 1 to 3 in British Columbia, Ontario and Quebec, Canada: a cohort study. *CMAJ Open* 2022. DOI:10.9778/cmajo.20210216. Copyright © 2022 The Author(s) or their employer(s). To receive this resource in an accessible format, please contact us at [cmajgroup.cmaj.ca](mailto:cmajgroup.cmaj.ca).

**British Columbia:**

St. Paul's Hospital, Vancouver, BC, Can.: Drs. James A. Russell, Nadia Khan, John Boyd, Keith R. Walley, Anita Palepu, Adeera Levin. Centre for Health Evaluation and Outcomes Science (CHEOS), St. Paul's Hospital, Vancouver, BC, Can.: Drs. Joel Singer, Terry Lee. British Columbia Women's and Children's Hospital, Vancouver, BC, Can.: Dr. Srinivas Murthy. Vancouver General Hospital, Vancouver, BC, Can.: Drs. David Sweet, Karen Tran. Royal Columbian Hospital, New Westminster, BC, Can.: Dr Steve Reynolds. Surrey Memorial Hospital, Surrey, BC, Can.: Dr. Greg Haljan. British Columbia Centres for Disease Control: Dr. David Patrick.

**Province of Quebec (PQ):**

CHUS, Sherbrooke, PQ, Can.: Dr. Francois Lamontagne. McGill University Health Centre, Montreal, PQ, Can.: Dr. Matthew P. Cheng, Dr. Todd C. Lee.

**Ontario:**

Sunnybrook Hospital, Toronto, Ont. Can.: Dr. Robert Fowler. Mount Sinai Hospital, Toronto, Ont. Can.: Dr. Allison McGeer. St Michael's Hospital, Toronto, Ont., Can.: Drs. John Marshall, Art Slutsky. Kingston General Hospital, Kingston, Ont., Can.: Drs. David Maslove, Santiago Perez Patrigeon. University of Ottawa, Ottawa, Ont., Can.: Dr. Kevin Burns.

**Manitoba:**

Winnipeg Health Sciences Centre, Winnipeg, Man., Can.: Dr. Anand Kumar.

**Alberta:**

Foothills Hospital, Calgary, Alberta, Can.: Dr. Brent Winston.

University of Alberta, Edmonton, Alta., Can.: Dr. Oleksa Rewa.

**USA:**

University of Pennsylvania, Philadelphia, Pa., USA: Dr. Michael Harhay.

The following persons and institutions participated in the ARBs CORONA I Study: **Steering Committee** – J.A. Russell (chair), Genevieve Rocheleau (former project manager), Puneet Mann (project manager), D. Sweet, G. Haljan, M. Cheng, D. C. Vinh, T. Lee, F. Lamontagne, B. Winston, O. Rewa, J. Marshall, A. McGeer, R. Fowler, David Maslove, Santiago Perez Patrigeon. **Management Committee** - J.A. Russell (chair), Genevieve Rocheleau (project manager), Puneet Mann (project manager), Karen Tran, Joel Singer. **Data Management** – J. Singer, T. Lee.

**CLINICAL CENTERS AND ARBs CORONA I INVESTIGATORS:**

**Canada. British Columbia:** *St. Paul's Hospital* (Coordinating Centre) - J.A. Russell, K.R. Walley, J. Boyd, T. Lee, J. Singer. *Vancouver General Hospital* - D. Sweet, K. Tran. *Royal Columbian Hospital* – S. Reynolds. *Surrey Memorial Hospital* - G. Haljan. **Quebec:** *McGill University Centre Hospital* – M.P. Cheng, D.C. Vinh, TC Lee. *Sherbrooke* – F. Lamontagne. **Alberta:** *Calgary General Hospital* – B. Winston, *University of Alberta* - O. Rewa. **Ontario:** *St. Michael's Hospital* – J. Marshall, A. Slutsky. *Mount Sinai Hospital* – A. McGeer, V. Sivanantham. *Sunnybrook and Women's College Health Science Centre* – R. Fowler. *Kingston General Hospital* - David Maslove, Santiago Perez Patrigeon.

**Table S1: Number of patients by province and site**

| Variable                                           | All (n=1337) | Wave        |             |             |
|----------------------------------------------------|--------------|-------------|-------------|-------------|
|                                                    |              | 1st (n=520) | 2nd (n=572) | 3rd (n=245) |
| Province, n (%)                                    |              |             |             |             |
| BC                                                 | 695 (52.0)   | 136 (26.2)  | 361 (63.1)  | 198 (80.8)  |
| ON                                                 | 272 (20.3)   | 24 (4.6)    | 201 (35.1)  | 47 (19.2)   |
| QC                                                 | 370 (27.7)   | 360 (69.2)  | 10 (1.7)    | 0 (0.0)     |
| Site, n (%)                                        |              |             |             |             |
| St. Paul's Hospital, Vancouver, BC                 | 213 (15.9)   | 66 (12.7)   | 92 (16.1)   | 55 (22.4)   |
| Vancouver General Hospital, Vancouver, BC          | 320 (23.9)   | 55 (10.6)   | 157 (27.4)  | 108 (44.1)  |
| Surrey Memorial Hospital, Surrey, BC               | 162 (12.1)   | 15 (2.9)    | 112 (19.6)  | 35 (14.3)   |
| Humber River Hospital, North York, ON              | 51 (3.8)     | 0 (0.0)     | 45 (7.9)    | 6 (2.4)     |
| Kingston General Hospital, Kingston, ON            | 18 (1.3)     | 4 (0.8)     | 13 (2.3)    | 1 (0.4)     |
| Mount Sinai Hospital, Toronto, ON                  | 142 (10.6)   | 20 (3.8)    | 82 (14.3)   | 40 (16.3)   |
| Sunnybrook Hospital, Toronto, ON                   | 61 (4.6)     | 0 (0.0)     | 61 (10.7)   | 0 (0.0)     |
| McGill University Health Centre, Montreal, QC      | 258 (19.3)   | 258 (49.6)  | 0 (0.0)     | 0 (0.0)     |
| Centre hospitalier universitaire de Sherbrooke, QC | 112 (8.4)    | 102 (19.6)  | 10 (1.7)    | 0 (0.0)     |

**Table S2: Co-morbidities of patients admitted with acute COVID-19**

| Variable                      | All (n=1337)    | Wave           |                |                | P      |
|-------------------------------|-----------------|----------------|----------------|----------------|--------|
|                               |                 | 1st (n=520)    | 2nd (n=572)    | 3rd (n=245)    |        |
| Co-morbidities, n (%)         |                 |                |                |                |        |
| Any of the four below         | 899/1331 (67.5) | 370/518 (71.4) | 381/569 (67.0) | 148/244 (60.7) | 0.011  |
| Chronic cardiac disease       | 353/1324 (26.7) | 166/517 (32.1) | 141/565 (25.0) | 46/242 (19.0)  | <0.001 |
| Chronic kidney disease        | 199/1332 (14.9) | 82/519 (15.8)  | 94/570 (16.5)  | 23/243 (9.5)   | 0.029  |
| Hypertension                  | 709/1330 (53.3) | 295/519 (56.8) | 299/569 (52.5) | 115/242 (47.5) | 0.050  |
| Diabetes                      | 424/1330 (31.9) | 170/518 (32.8) | 183/568 (32.2) | 71/244 (29.1)  | 0.574  |
| Chronic pulmonary disease     | 214/1327 (16.1) | 102/519 (19.7) | 81/567 (14.3)  | 31/241 (12.9)  | 0.018  |
| Liver disease                 | 56/1331 (4.2)   | 21/517 (4.1)   | 21/570 (3.7)   | 14/244 (5.7)   | 0.400  |
| Chronic neurological disorder | 147/1330 (11.1) | 68/519 (13.1)  | 56/569 (9.8)   | 23/242 (9.5)   | 0.161  |
| Malignant neoplasm            | 101/1324 (7.6)  | 43/517 (8.3)   | 36/564 (6.4)   | 22/243 (9.1)   | 0.318  |
| Chronic hematologic disease   | 60/1330 (4.5)   | 30/518 (5.8)   | 25/569 (4.4)   | 5/243 (2.1)    | 0.068  |
| AIDS / HIV                    | 10/1305 (0.8)   | 4/491 (0.8)    | 2/570 (0.4)    | 4/244 (1.6)    | 0.154  |
| Rheumatologic disorder        | 150/1330 (11.3) | 41/517 (7.9)   | 76/570 (13.3)  | 33/243 (13.6)  | 0.009  |
| Dementia                      | 154/1328 (11.6) | 100/516 (19.4) | 42/569 (7.4)   | 12/243 (4.9)   | <0.001 |
| Malnutrition                  | 11/1331 (0.8)   | 8/517 (1.5)    | 3/570 (0.5)    | 0/244 (0.0)    | 0.062  |

P value was based on Chi-square test or Fisher's exact test as appropriate.



**Table S3: COVID-19 therapies during the hospital course.**

| Variable, n (%)     | All (n=1337)    | Wave          |                |               | P      |
|---------------------|-----------------|---------------|----------------|---------------|--------|
|                     |                 | 1st (n=520)   | 2nd (n=572)    | 3rd (n=245)   |        |
| Antiviral agent     | 211/1330 (15.9) | 72/516 (14.0) | 106/569 (18.6) | 33/245 (13.5) | 0.057  |
| Lopinavir/Ritonavir | 13/1330 (1.0)   | 13/516 (2.5)  | 0/569 (0.0)    | 0/245 (0.0)   | <0.001 |
| Remdesivir          | 128/1330 (9.6)  | 8/516 (1.6)   | 96/569 (16.9)  | 24/245 (9.8)  | <0.001 |
| Antibiotic          | 1119 (83.7)     | 434 (83.5)    | 486 (85.0)     | 199 (81.2)    | 0.408  |
| Corticosteroid      | 882 (66.0)      | 160 (30.8)    | 499 (87.2)     | 223 (91.0)    | <0.001 |
| Dexamethasone       | 756 (56.5)      | 56 (10.8)     | 482 (84.3)     | 218 (89.0)    | <0.001 |
| Antifungal agent    | 73 (5.5)        | 34 (6.5)      | 23 (4.0)       | 16 (6.5)      | 0.135  |

P value was based on Chi-square test or Fisher's exact test as appropriate.

**Table S4:** Mortality in patients hospitalized with acute COVID-19 in unadjusted and adjusted analyses.

| Variable                                                | 28-day mortality             |       |                            |        | In-hospital death            |        |                            |        |
|---------------------------------------------------------|------------------------------|-------|----------------------------|--------|------------------------------|--------|----------------------------|--------|
|                                                         | Unadjusted analysis (n=1337) |       | Adjusted analysis (n=1259) |        | Unadjusted analysis (n=1337) |        | Adjusted analysis (n=1259) |        |
|                                                         | Odds ratio (95% CI)          | P     | Odds ratio (95% CI)        | P      | Odds ratio (95% CI)          | P      | Odds ratio (95% CI)        | P      |
| Wave                                                    |                              |       |                            |        |                              |        |                            |        |
| 2 vs 1                                                  | 0.94 (0.63, 1.39)            | 0.750 | 0.89 (0.61, 1.29)          | 0.528  | 0.82 (0.59, 1.14)            | 0.246  | 0.84 (0.58, 1.20)          | 0.333  |
| 3 vs 1                                                  | 0.43 (0.24, 0.78)            | 0.005 | 0.46 (0.26, 0.81)          | 0.007  | 0.41 (0.25, 0.69)            | <0.001 | 0.46 (0.27, 0.80)          | 0.005  |
| 3 vs 2                                                  | 0.46 (0.27, 0.79)            | 0.004 | 0.52 (0.29, 0.91)          | 0.022  | 0.50 (0.31, 0.81)            | 0.005  | 0.56 (0.33, 0.94)          | 0.028  |
| Male                                                    |                              |       | 1.06 (0.74, 1.52)          | 0.733  |                              |        | 1.29 (0.92, 1.82)          | 0.139  |
| Age (per 10 years increase)                             |                              |       | 2.23 (1.91, 2.61)          | <0.001 |                              |        | 1.99 (1.73, 2.30)          | <0.001 |
| SBP (per 10mm Hg increase)                              |                              |       | 0.93 (0.86, 1.00)          | 0.058  |                              |        | 0.93 (0.87, 1.00)          | 0.051  |
| Chronic kidney disease                                  |                              |       | 0.94 (0.56, 1.59)          | 0.823  |                              |        | 0.88 (0.53, 1.45)          | 0.609  |
| Chronic cardiac disease                                 |                              |       | 0.92 (0.63, 1.33)          | 0.642  |                              |        | 0.97 (0.68, 1.39)          | 0.882  |
| Diabetes                                                |                              |       | 1.57 (1.10, 2.25)          | 0.013  |                              |        | 1.43 (1.02, 2.00)          | 0.037  |
| Hypertension                                            |                              |       | 0.85 (0.58, 1.25)          | 0.403  |                              |        | 0.93 (0.65, 1.33)          | 0.683  |
| Heart rate (per 10 beats/minute increase)               |                              |       | 1.18 (1.08, 1.29)          | <0.001 |                              |        | 1.11 (1.02, 1.21)          | 0.014  |
| Creatinine (per log $\mu\text{mol/L}$ increase)         |                              |       | 1.86 (1.25, 2.75)          | 0.002  |                              |        | 1.91 (1.32, 2.76)          | <0.001 |
| Oxygen saturation - SaO <sub>2</sub> (per 5 % increase) |                              |       | 0.79 (0.71, 0.88)          | <0.001 |                              |        | 0.80 (0.72, 0.89)          | <0.001 |

All analyses have adjusted for site as a random effect.

Odds ratio of <1 implied **less likely** to experience the outcome.

**Table S5:** Use of mechanical ventilation, renal replacement therapy (RRT) and vasopressors in patients hospitalized with acute COVID-19 in unadjusted and adjusted analyses.

| Variable                                                | Mechanical ventilation - while hospitalized |        |                            |        | RRT - while hospitalized     |       |                            |        | Use of vasopressors - while hospitalized |       |                            |        |
|---------------------------------------------------------|---------------------------------------------|--------|----------------------------|--------|------------------------------|-------|----------------------------|--------|------------------------------------------|-------|----------------------------|--------|
|                                                         | Unadjusted analysis (n=1337)                |        | Adjusted analysis (n=1259) |        | Unadjusted analysis (n=1320) |       | Adjusted analysis (n=1244) |        | Unadjusted analysis (n=1337)             |       | Adjusted analysis (n=1259) |        |
|                                                         | Odds ratio (95% CI)                         | P      | Odds ratio (95% CI)        | P      | Odds ratio (95% CI)          | P     | Odds ratio (95% CI)        | P      | Diff (95% CI)                            | P     | Diff (95% CI)              | P      |
| Wave                                                    |                                             |        |                            |        |                              |       |                            |        |                                          |       |                            |        |
| 2 vs 1                                                  | 0.56 (0.34, 0.93)                           | 0.023  | 0.58 (0.42, 0.80)          | <0.001 | 0.81 (0.47, 1.41)            | 0.463 | 0.53 (0.28, 1.02)          | 0.058  | 0.67 (0.43, 1.07)                        | 0.092 | 0.63 (0.40, 0.98)          | 0.042  |
| 3 vs 1                                                  | 0.37 (0.21, 0.65)                           | <0.001 | 0.34 (0.22, 0.54)          | <0.001 | 0.32 (0.12, 0.84)            | 0.022 | 0.17 (0.05, 0.63)          | 0.008  | 0.51 (0.30, 0.85)                        | 0.009 | 0.43 (0.25, 0.73)          | 0.002  |
| 3 vs 2                                                  | 0.66 (0.43, 1.01)                           | 0.056  | 0.59 (0.38, 0.92)          | 0.021  | 0.39 (0.15, 1.03)            | 0.056 | 0.33 (0.09, 1.18)          | 0.087  | 0.75 (0.51, 1.12)                        | 0.165 | 0.69 (0.45, 1.05)          | 0.084  |
| Male                                                    |                                             |        | 1.44 (1.05, 1.96)          | 0.022  |                              |       | 1.11 (0.57, 2.17)          | 0.764  |                                          |       | 1.61 (1.18, 2.21)          | 0.003  |
| Age (per 10 years increase)                             |                                             |        | 0.83 (0.75, 0.92)          | <0.001 |                              |       | 0.73 (0.57, 0.92)          | 0.008  |                                          |       | 0.91 (0.82, 1.01)          | 0.071  |
| SBP (per 10mm Hg increase)                              |                                             |        | 1.01 (0.94, 1.07)          | 0.855  |                              |       | 1.14 (1.01, 1.30)          | 0.038  |                                          |       | 0.94 (0.88, 1.00)          | 0.063  |
| Chronic kidney disease                                  |                                             |        | 0.55 (0.31, 0.97)          | 0.039  |                              |       | 0.41 (0.16, 1.09)          | 0.073  |                                          |       | 0.49 (0.28, 0.87)          | 0.014  |
| Chronic cardiac disease                                 |                                             |        | 0.86 (0.60, 1.24)          | 0.425  |                              |       | 1.82 (0.91, 3.65)          | 0.091  |                                          |       | 0.97 (0.67, 1.39)          | 0.858  |
| Diabetes                                                |                                             |        | 1.49 (1.09, 2.04)          | 0.013  |                              |       | 1.23 (0.65, 2.33)          | 0.533  |                                          |       | 1.31 (0.96, 1.80)          | 0.091  |
| Hypertension                                            |                                             |        | 1.20 (0.86, 1.69)          | 0.290  |                              |       | 2.69 (1.15, 6.27)          | 0.022  |                                          |       | 1.14 (0.81, 1.59)          | 0.460  |
| Heart rate (per 10 beats/minute increase)               |                                             |        | 1.05 (0.98, 1.13)          | 0.174  |                              |       | 1.01 (0.87, 1.18)          | 0.879  |                                          |       | 1.08 (1.00, 1.16)          | 0.041  |
| Creatinine (per log $\mu\text{mol/L}$ increase)         |                                             |        | 1.52 (1.07, 2.16)          | 0.019  |                              |       | 8.97 (4.88, 16.49)         | <0.001 |                                          |       | 1.71 (1.21, 2.43)          | 0.003  |
| Oxygen saturation - SaO <sub>2</sub> (per 5 % increase) |                                             |        | 0.75 (0.68, 0.82)          | <0.001 |                              |       | 0.88 (0.73, 1.04)          | 0.141  |                                          |       | 0.75 (0.68, 0.83)          | <0.001 |

All analyses have adjusted for site as a random effect.

Odds ratio of <1 implied **less likely** to experience the outcome.

**Table S6:** Use of mechanical ventilation, renal replacement therapy (RRT) and vasopressors over 14 days in patients hospitalized with acute COVID-19 in unadjusted and adjusted analyses.

| Variable                                    | Mechanical ventilation - first 14 days |        |                            |        | RRT- first 14 days           |       |                            |        | Use of vasopressors - first 14 days |       |                            |        |
|---------------------------------------------|----------------------------------------|--------|----------------------------|--------|------------------------------|-------|----------------------------|--------|-------------------------------------|-------|----------------------------|--------|
|                                             | Unadjusted analysis (n=1337)           |        | Adjusted analysis (n=1259) |        | Unadjusted analysis (n=1315) |       | Adjusted analysis (n=1241) |        | Unadjusted analysis (n=1335)        |       | Adjusted analysis (n=1258) |        |
|                                             | Odds ratio (95% CI)                    | P      | Odds ratio (95% CI)        | P      | Odds ratio (95% CI)          | P     | Odds ratio (95% CI)        | P      | Diff (95% CI)                       | P     | Diff (95% CI)              | P      |
| Wave                                        |                                        |        |                            |        |                              |       |                            |        |                                     |       |                            |        |
| 2 vs 1                                      | 0.57 (0.35, 0.93)                      | 0.024  | 0.58 (0.42, 0.80)          | <0.001 | 0.90 (0.45, 1.82)            | 0.778 | 0.54 (0.23, 1.27)          | 0.157  | 0.68 (0.43, 1.07)                   | 0.097 | 0.62 (0.39, 0.98)          | 0.042  |
| 3 vs 1                                      | 0.36 (0.21, 0.62)                      | <0.001 | 0.33 (0.21, 0.53)          | <0.001 | 0.48 (0.16, 1.39)            | 0.175 | 0.25 (0.06, 1.02)          | 0.054  | 0.51 (0.31, 0.85)                   | 0.010 | 0.44 (0.26, 0.74)          | 0.002  |
| 3 vs 2                                      | 0.63 (0.41, 0.97)                      | 0.036  | 0.57 (0.36, 0.90)          | 0.016  | 0.53 (0.19, 1.43)            | 0.207 | 0.46 (0.12, 1.75)          | 0.255  | 0.75 (0.50, 1.13)                   | 0.166 | 0.70 (0.46, 1.08)          | 0.108  |
| Male                                        |                                        |        | 1.42 (1.04, 1.94)          | 0.028  |                              |       | 0.97 (0.46, 2.02)          | 0.927  |                                     |       | 1.59 (1.16, 2.17)          | 0.004  |
| Age (per 10 years increase)                 |                                        |        | 0.83 (0.75, 0.93)          | <0.001 |                              |       | 0.66 (0.51, 0.86)          | 0.002  |                                     |       | 0.92 (0.83, 1.02)          | 0.109  |
| SBP (per 10mm Hg increase)                  |                                        |        | 1.00 (0.94, 1.07)          | 0.897  |                              |       | 1.14 (0.99, 1.31)          | 0.072  |                                     |       | 0.94 (0.88, 1.00)          | 0.051  |
| Chronic kidney disease                      |                                        |        | 0.52 (0.29, 0.93)          | 0.028  |                              |       | 0.58 (0.21, 1.65)          | 0.308  |                                     |       | 0.47 (0.26, 0.84)          | 0.011  |
| Chronic cardiac disease                     |                                        |        | 0.84 (0.58, 1.21)          | 0.348  |                              |       | 2.22 (1.03, 4.80)          | 0.042  |                                     |       | 0.95 (0.66, 1.37)          | 0.785  |
| Diabetes                                    |                                        |        | 1.48 (1.08, 2.03)          | 0.015  |                              |       | 1.00 (0.49, 2.06)          | 0.992  |                                     |       | 1.32 (0.96, 1.81)          | 0.090  |
| Hypertension                                |                                        |        | 1.18 (0.84, 1.66)          | 0.340  |                              |       | 3.36 (1.25, 8.98)          | 0.016  |                                     |       | 1.09 (0.77, 1.53)          | 0.626  |
| Heart rate (per 10 beats/minute increase)   |                                        |        | 1.05 (0.98, 1.14)          | 0.160  |                              |       | 0.98 (0.83, 1.16)          | 0.823  |                                     |       | 1.08 (1.01, 1.17)          | 0.034  |
| Creatinine (per log µmol/L increase)        |                                        |        | 1.57 (1.11, 2.24)          | 0.011  |                              |       | 7.54 (4.00, 14.19)         | <0.001 |                                     |       | 1.77 (1.25, 2.52)          | 0.001  |
| Oxygen saturation - SaO2 (per 5 % increase) |                                        |        | 0.74 (0.68, 0.82)          | <0.001 |                              |       | 0.88 (0.72, 1.08)          | 0.221  |                                     |       | 0.75 (0.68, 0.82)          | <0.001 |

All analyses have adjusted for site as a random effect.

Odds ratio of <1 implied **less likely** to experience the outcome.

**Table S7:** Days alive and free of organ support by zero-one inflated beta regression in patients hospitalized with acute COVID-19.

| Variable                                    | DAF mechanical ventilation - first 14 days |        |                            |        | DAF RRT - first 14 days      |       |                    |   | DAF vasopressors - first 14 days |        |                            |        |
|---------------------------------------------|--------------------------------------------|--------|----------------------------|--------|------------------------------|-------|--------------------|---|----------------------------------|--------|----------------------------|--------|
|                                             | Unadjusted analysis (n=1330)               |        | Adjusted analysis (n=1272) |        | Unadjusted analysis (n=1319) |       | Adjusted analysis* |   | Unadjusted analysis (n=1331)     |        | Adjusted analysis (n=1275) |        |
|                                             | Mean diff (95% CI)                         | P      | Mean diff (95% CI)         | P      | Mean diff (95% CI)           | P     | Mean diff (95% CI) | P | Mean diff (95% CI)               | P      | Mean diff (95% CI)         | P      |
| Wave                                        |                                            |        |                            |        |                              |       |                    |   |                                  |        |                            |        |
| 2 vs 1                                      | 1.20 (0.06, 2.29)                          | <0.001 | 1.39 (0.29, 2.41)          | <0.001 | 0.06 (-1.01, 0.94)           | 0.910 | -                  |   | 0.43 (-0.71, 1.35)               | 0.177  | 0.49 (-0.61, 1.44)         | 0.111  |
| 3 vs 1                                      | 2.20 (1.09, 3.21)                          | <0.001 | 2.32 (1.28, 3.33)          | <0.001 | 0.76 (-0.37, 1.70)           | 0.141 | -                  |   | 1.34 (0.31, 2.27)                | <0.001 | 1.30 (0.20, 2.19)          | <0.001 |
| 3 vs 2                                      | 1.00 (0.19, 1.74)                          | 0.013  | 0.94 (0.14, 1.62)          | 0.017  | 0.71 (-0.02, 1.47)           | 0.063 | -                  |   | 0.91 (0.16, 1.74)                | 0.014  | 0.81 (0.05, 1.60)          | 0.026  |
| Male                                        |                                            |        | -0.38 (-0.93, 0.22)        | 0.185  |                              |       | -                  |   |                                  |        | -0.25 (-0.79, 0.31)        | 0.365  |
| Age (per 10 years increase)                 |                                            |        | -0.57 (-0.80, -0.35)       | <0.001 |                              |       | -                  |   |                                  |        | -0.73 (-0.95, -0.54)       | <0.001 |
| SBP (per 10mm Hg increase)                  |                                            |        | 0.12 (-0.01, 0.24)         | 0.066  |                              |       | -                  |   |                                  |        | 0.12 (-0.00, 0.24)         | 0.043  |
| Chronic kidney disease                      |                                            |        | 0.30 (-0.78, 1.16)         | 0.469  |                              |       | -                  |   |                                  |        | 0.22 (-0.76, 1.11)         | 0.552  |
| Chronic cardiac disease                     |                                            |        | 0.13 (-0.62, 0.81)         | 0.689  |                              |       | -                  |   |                                  |        | 0.02 (-0.67, 0.64)         | 0.944  |
| Diabetes                                    |                                            |        | -0.89 (-1.56, -0.23)       | 0.004  |                              |       | -                  |   |                                  |        | -0.66 (-1.30, -0.08)       | 0.023  |
| Hypertension                                |                                            |        | 0.27 (-0.39, 0.95)         | 0.344  |                              |       | -                  |   |                                  |        | 0.33 (-0.27, 0.94)         | 0.213  |
| Heart rate (per 10 beats/minute increase)   |                                            |        | -0.28 (-0.45, -0.13)       | <0.001 |                              |       | -                  |   |                                  |        | -0.28 (-0.44, -0.13)       | <0.001 |
| Creatinine (per log µmol/L increase)        |                                            |        | -0.98 (-1.60, -0.40)       | 0.001  |                              |       | -                  |   |                                  |        | -0.96 (-1.53, -0.35)       | 0.001  |
| Oxygen saturation - SaO2 (per 5 % increase) |                                            |        | 0.55 (0.39, 0.73)          | <0.001 |                              |       | -                  |   |                                  |        | 0.45 (0.30, 0.60)          | 0.001  |

\* Adjusted regression analysis was not feasible numerically as too few patients used RRT during the first 14 days and so most DAF values were 0 or 14.

Estimated difference of >0 implied **more** days alive free of organ support (i.e., better outcome).

All analyses have adjusted for site as a fixed effect.

**Table S8:** Results from adjusted regression analysis restricting to BC data.

| Variable | 28-day mortality    |       | In-hospital death   |       |
|----------|---------------------|-------|---------------------|-------|
|          | Odds ratio (95% CI) | P     | Odds ratio (95% CI) | P     |
| Wave     |                     |       |                     |       |
| 2 vs 1   | 0.71 (0.35, 1.41)   | 0.325 | 0.60 (0.31, 1.18)   | 0.138 |
| 3 vs 1   | 0.33 (0.14, 0.80)   | 0.014 | 0.30 (0.13, 0.66)   | 0.003 |
| 3 vs 2   | 0.47 (0.22, 1.00)   | 0.049 | 0.49 (0.25, 0.97)   | 0.041 |

| Variable | Mechanical ventilation – while hospitalized |        | RRT – while hospitalized |       | Use of vasopressors – while hospitalized |        |
|----------|---------------------------------------------|--------|--------------------------|-------|------------------------------------------|--------|
|          | Odds ratio (95% CI)                         | P      | Odds ratio (95% CI)      | P     | Odds ratio (95% CI)                      | P      |
| Wave     |                                             |        |                          |       |                                          |        |
| 2 vs 1   | 0.31 (0.19, 0.52)                           | <0.001 | 0.36 (0.11, 1.16)        | 0.087 | 0.38 (0.23, 0.63)                        | <0.001 |
| 3 vs 1   | 0.22 (0.12, 0.40)                           | <0.001 | 0.18 (0.03, 0.96)        | 0.044 | 0.32 (0.18, 0.58)                        | <0.001 |
| 3 vs 2   | 0.71 (0.42, 1.21)                           | 0.208  | 0.50 (0.10, 2.45)        | 0.391 | 0.86 (0.52, 1.42)                        | 0.554  |

| Variable | Mechanical ventilation – first 14 days |        | RRT- first 14 days  |       | Use of vasopressors – first 14 days |        |
|----------|----------------------------------------|--------|---------------------|-------|-------------------------------------|--------|
|          | Odds ratio (95% CI)                    | P      | Odds ratio (95% CI) | P     | Odds ratio (95% CI)                 | P      |
| Wave     |                                        |        |                     |       |                                     |        |
| 2 vs 1   | 0.31 (0.19, 0.52)                      | <0.001 | 0.46 (0.10, 2.14)   | 0.321 | 0.37 (0.22, 0.63)                   | <0.001 |
| 3 vs 1   | 0.22 (0.12, 0.40)                      | <0.001 | 0.37 (0.06, 2.45)   | 0.303 | 0.33 (0.18, 0.59)                   | <0.001 |
| 3 vs 2   | 0.69 (0.41, 1.18)                      | 0.177  | 0.81 (0.15, 4.34)   | 0.805 | 0.88 (0.54, 1.46)                   | 0.632  |

| Variable | DAF mechanical ventilation - first 14 days |        | DAF vasopressors – first 14 days |       |
|----------|--------------------------------------------|--------|----------------------------------|-------|
|          | Odds ratio (95% CI)                        | P      | Odds ratio (95% CI)              | P     |
| Wave     |                                            |        |                                  |       |
| 2 vs 1   | 1.61 (0.47, 2.80)                          | 0.001  | 0.91 (-0.07, 1.87)               | 0.070 |
| 3 vs 1   | 2.59 (1.36, 3.76)                          | <0.001 | 1.63 (0.64, 2.60)                | 0.002 |
| 3 vs 2   | 0.98 (0.18, 1.71)                          | 0.024  | 0.73 (0.05, 1.41)                | 0.037 |

Adjusted analysis has accounted for age, sex, chronic heart disease, hypertension, chronic kidney disease, diabetes, baseline systolic blood pressure, baseline heart rate, baseline SaO<sub>2</sub>, baseline creatinine and site.

Analysis for DAF RRT was not feasible due to low event rate.
